# Supplementary material for: Synaptic plasticity realized by selective oxidation of TiS3 nanosheet for neuromorphic devices
Source: Royal Society of Chemistry journal article supplement (doi:10.1039/d3ra00782k), 2023-01-01
Supplement: d3ra00782k1.pdf [file d3ra00782k1.pdf]

Supplementary Information for

## Synaptic Plasticity Realized by Selective Oxidation of TiS<sub>3</sub> Nanosheet for Neuromorphic Devices

Jing-Kai Qin<sup>a</sup>, Hai-Lin Sun<sup>a</sup>, Pei-Yu Huang<sup>a</sup>, Yang Li<sup>b</sup>, Liang Zhen<sup>a, b</sup>, Cheng-Yan Xu<sup>a, b\*</sup>

<sup>a</sup> Sauvage Laboratory for Smart Materials, School of Materials Science and Engineering,  
Harbin Institute of Technology (Shenzhen), Shenzhen 518055, China

<sup>b</sup> MOE Key Laboratory of Micro-Systems and Micro-Structures Manufacturing, Harbin  
Institute of Technology, Harbin 150080, China

\*E-mail addresses: [cy\\_xu@hit.edu.cn](mailto:cy_xu@hit.edu.cn)

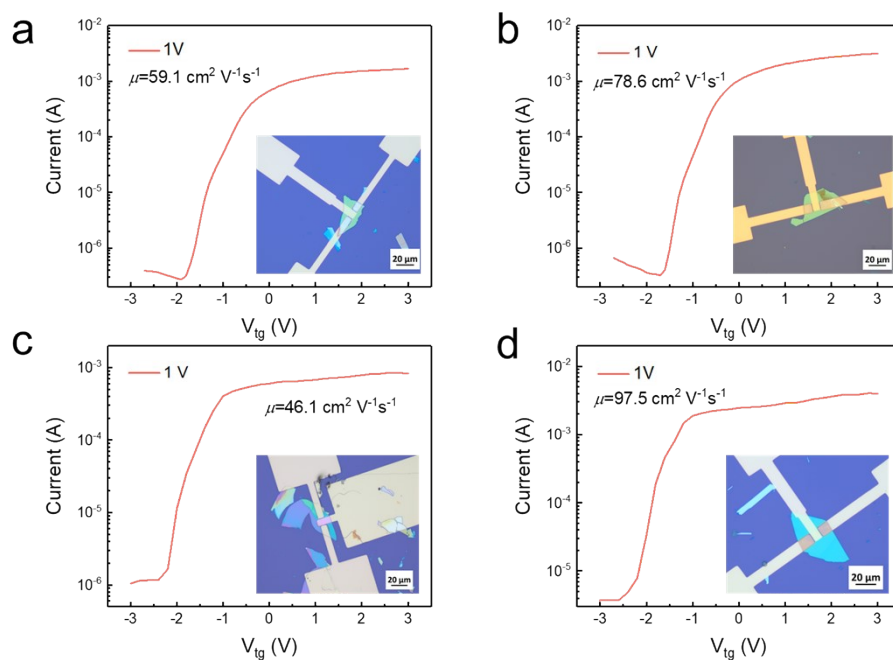

**Figure S1.** Photograph and transfer curves of typical device with mobility of (a)  $59.1 \text{ cm}^2 \text{ V}^{-1} \text{ s}^{-1}$ , (b)  $78.6 \text{ cm}^2 \text{ V}^{-1} \text{ s}^{-1}$ , (c)  $46.1 \text{ cm}^2 \text{ V}^{-1} \text{ s}^{-1}$ , (d)  $97.5 \text{ cm}^2 \text{ V}^{-1} \text{ s}^{-1}$ .

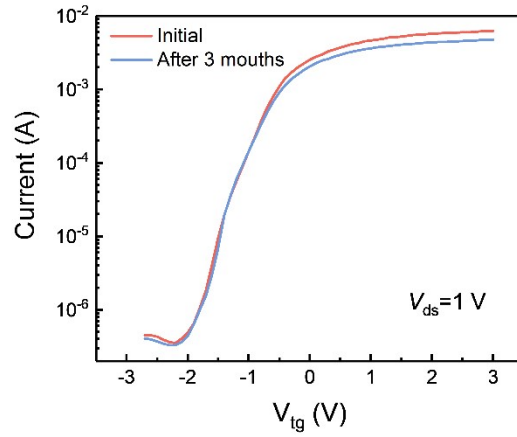

**Figure S2.** The environmental stability of  $\text{TiS}_3$  field-effect transistor after exposure to air for 3 months.

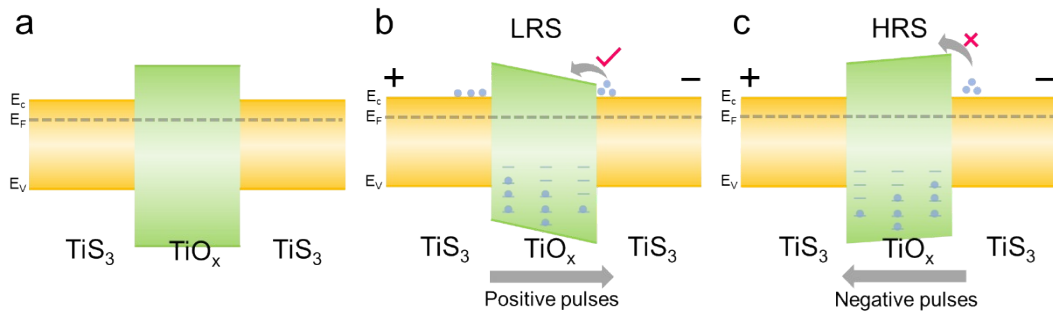

**Figure S3.** The energy band diagram of  $\text{TiS}_3\text{-TiO}_x\text{-TiS}_3$  heterostructures (a) in initial state, (b) in LRS programmed by positive pulses, (c) in HRS programmed by negative pulses.

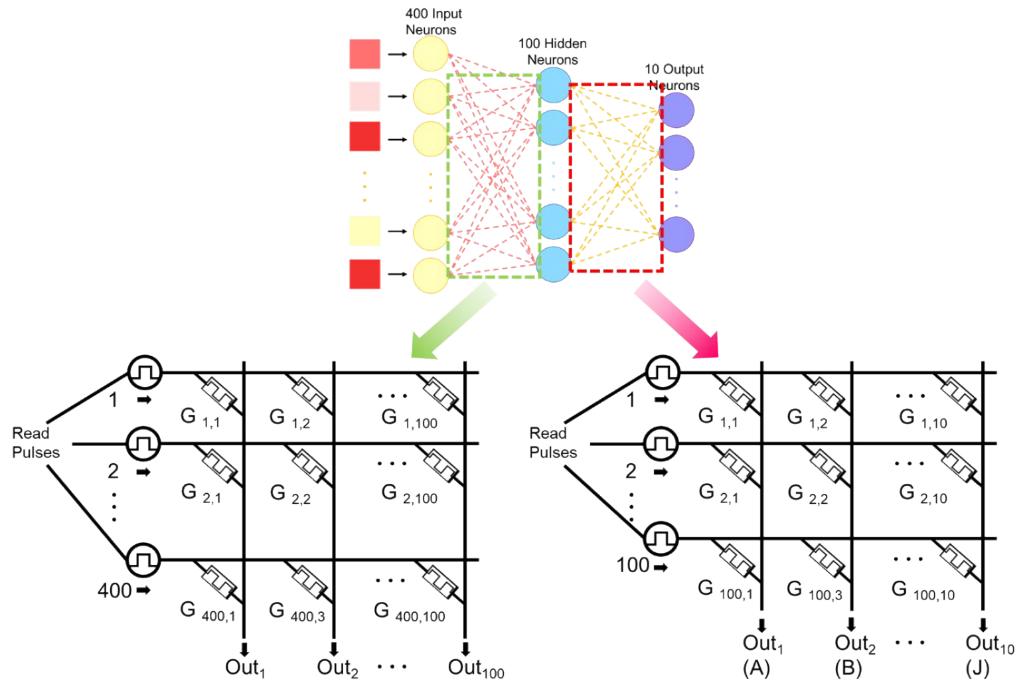

**Figure S4.** The corresponding schematic device array structure of ANN.
